# Supplementary material for: Preparation and recrystallization of amorphous l-glutamic acid
Source: Royal Society of Chemistry journal article supplement (doi:10.1039/d5ra09451h), 2026-05-11
Supplement: d5ra09451h1.pdf [file d5ra09451h1.pdf]

**Electronic Supplementary Information for**

# Preparation and Recrystallization of Amorphous L-Glutamic Acid

Yuhang Liu,<sup>a,b,c</sup> Yuchen Zheng,<sup>b</sup> Ziming Li,<sup>b</sup> Zhihai Wu,<sup>b</sup> Xiong Xiao,<sup>b</sup> Yongming Liu,<sup>d</sup>  
Wangchuan Xiao,<sup>b,c</sup> Fenghua Chen,<sup>\*,b,c</sup> and Rongrong Xue<sup>\*,b</sup>

<sup>a</sup>School of Chemical Engineering, Fuzhou University, Fuzhou 350116, Fujian, China;

<sup>b</sup>School of Resources and Chemical Engineering, Sanming University, Sanming 365004, Fujian, China.

<sup>c</sup>Fujian Engineering Research Center of Advanced Fluorine-containing Materials, Sanming University, Sanming 365004, Fujian, China.

<sup>d</sup>School of Education and Music, Sanming University, Sanming 365004, Fujian, China

\*Correspondence: (F. C.) E-mail: fenghuachen@fjismu.edu.cn., (R. X.) E-mail: rongrongxue@fjismu.edu.cn.

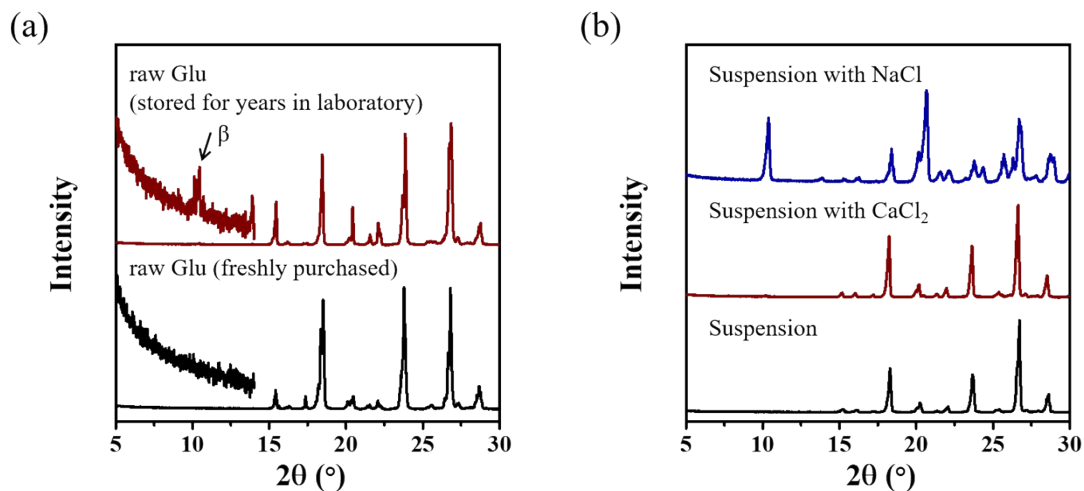

**Figure S1.** (a) PXRD patterns of the freshly purchased raw Glu and raw Glu after being stored for years. It is noticed that the stored raw Glu contains trace  $\beta$  polymorph, which is easy to be ignored without magnification. (b) PXRD patterns of the overnight suspension product of freshly purchased raw Glu in pure water,  $10 \text{ mg} \cdot \text{ml}^{-1}$  NaCl, and CaCl<sub>2</sub> aqueous solution. The suspension product in pure water maintained  $\alpha$  polymorph, and the product with NaCl became a mixture in which  $\beta$  polymorph is the main polymorph.

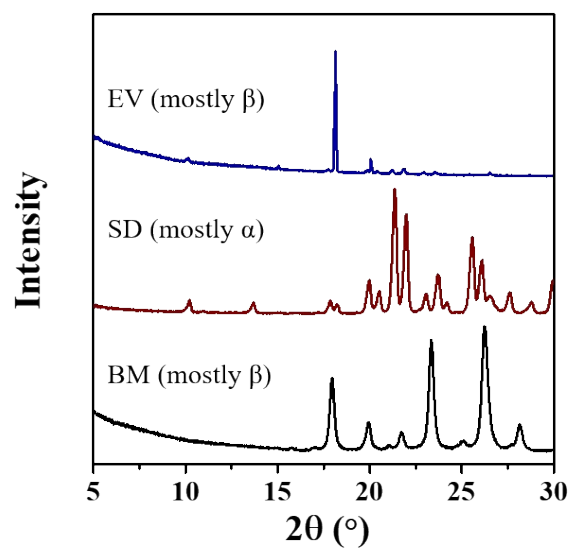

**Figure S2.** PXR D patterns of the ball milled product of raw Glu, spray drying product of Glu aqueous solution, and evaporation product of Glu aqueous solution.

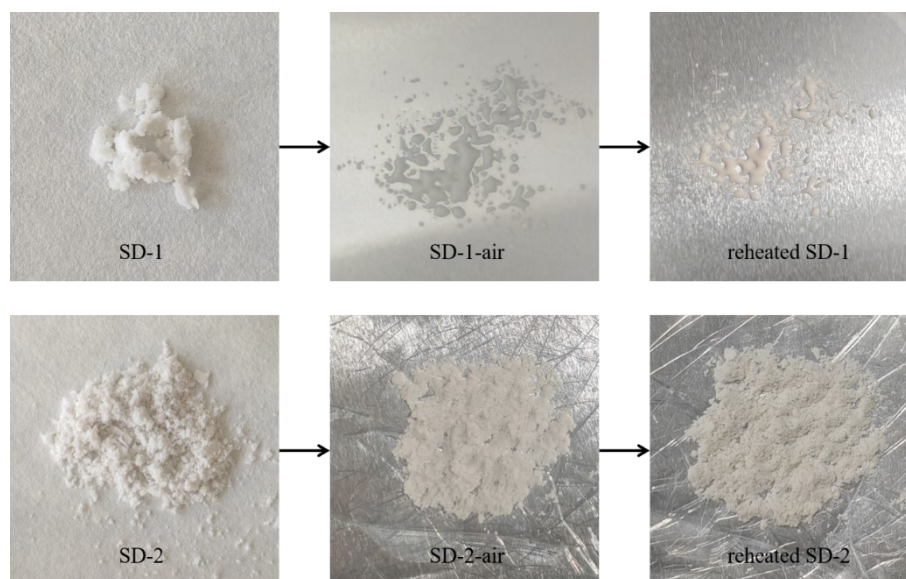

**Figure S3.** Optical images of (upon) SD-1, hydrophilic SD-1 kept in air (room temperature, humidity ~60%) overnight and reheated SD-1 (hydrophilic SD-1 was heated at 100 °C for three hours), and (down) SD-2, hydrophilic SD-2 and reheated SD-2.

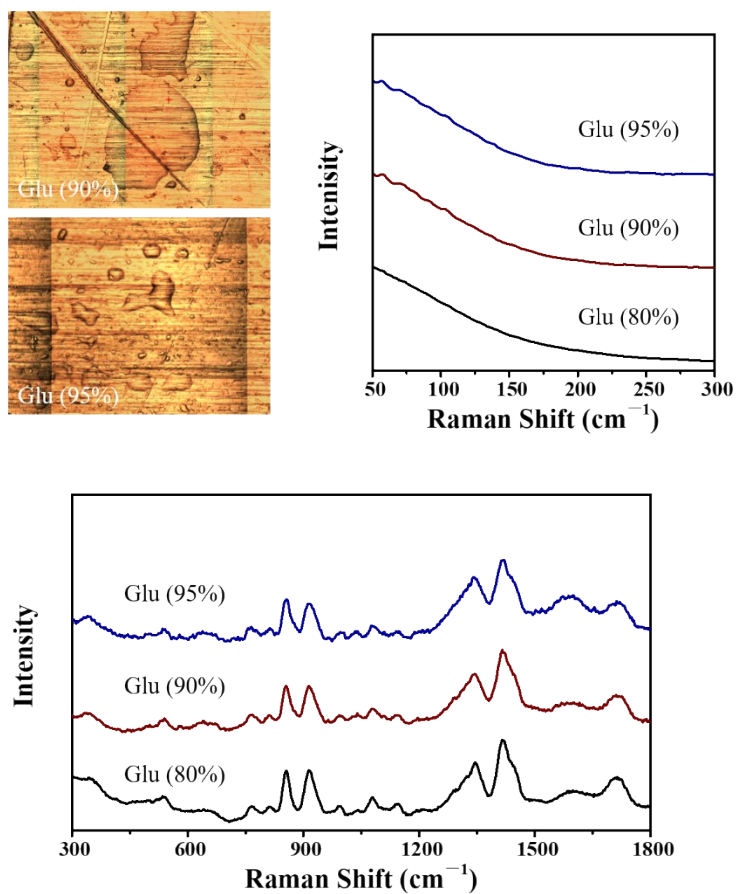

**Figure S4.** Optical images, low-frequency and mid-frequency Raman spectra of the evaporated amorphous product with higher mole ratios of Glu and CaCl<sub>2</sub>. The Glu contents are 80, 90 and 95 wt.%.

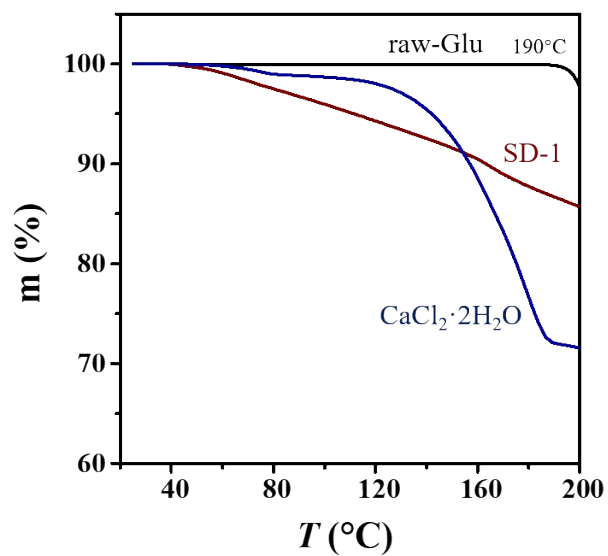

**Figure S5.** TG curves of raw-Glu,  $\text{CaCl}_2 \cdot 2\text{H}_2\text{O}$  and SD-1 ( $\text{N}_2$ ,  $10 \text{ K} \cdot \text{min}^{-1}$ ). The TG curve of SD-1 shows a continuous process of water loss.

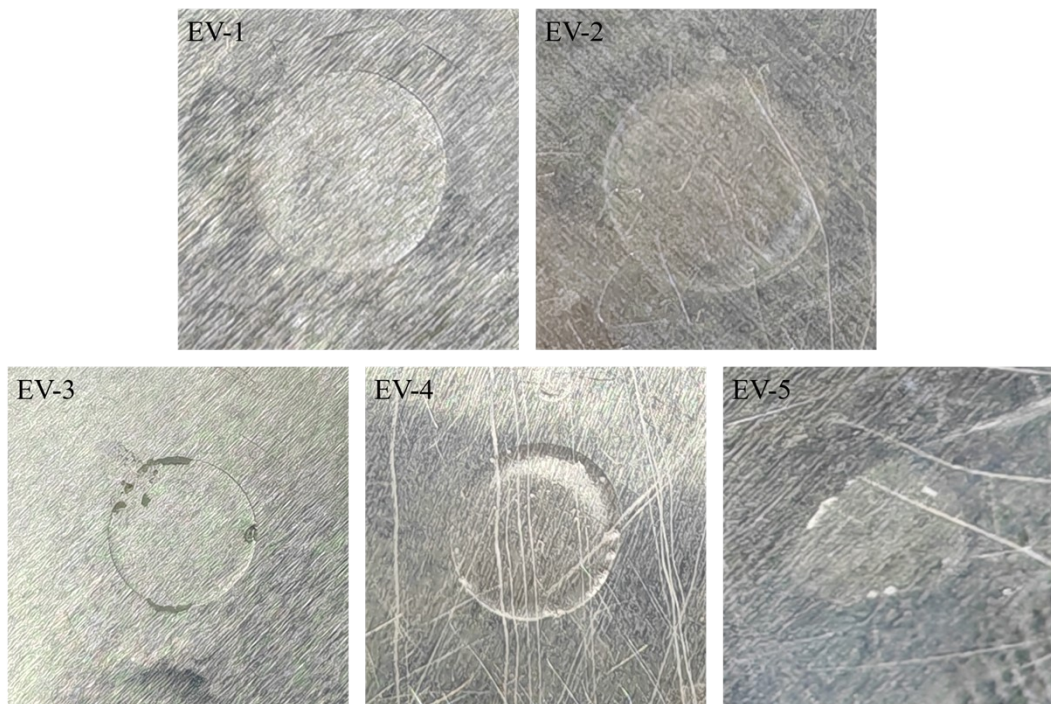

**Figure S6.** Optical images of EV-1 to EV-5 with a smaller evaporation volume of  $50 \mu\text{l}$  at  $100 \text{ }^\circ\text{C}$ .

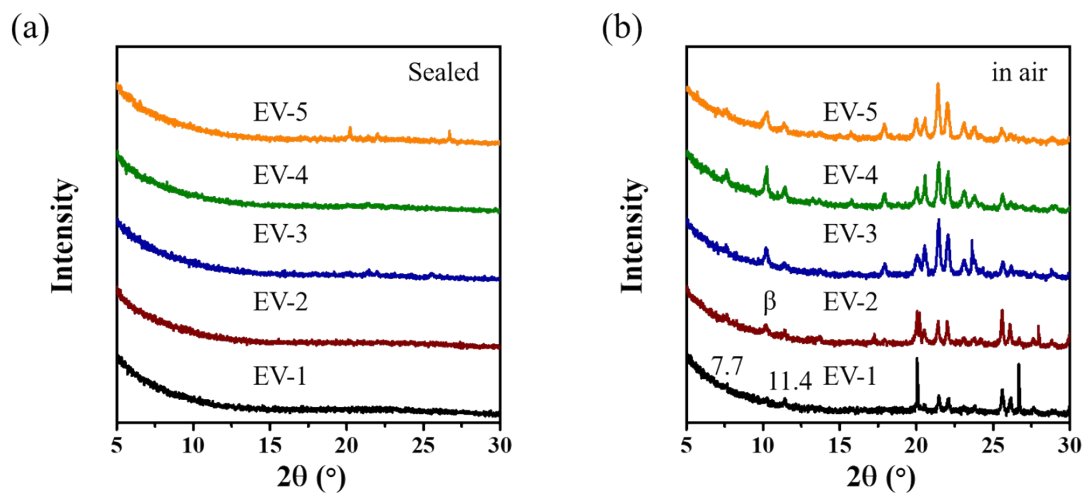

**Figure S7.** PXRD patterns of EV-1 to EV-5 kept (a) in a sealed environment for 7 days, and (b) in air overnight.

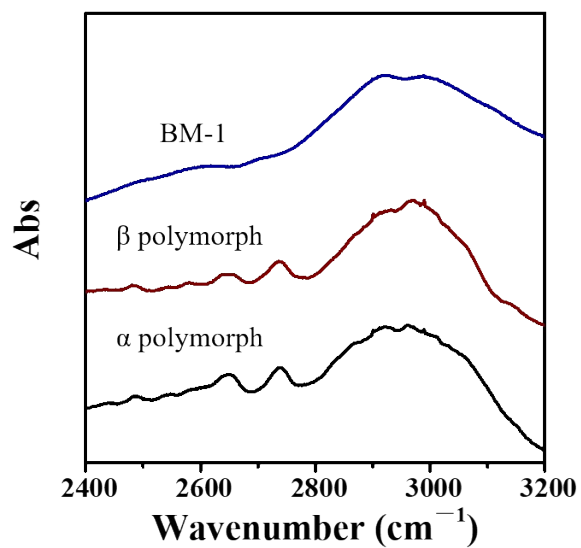

**Figure S8.** IR spectra of  $\alpha$  polymorph,  $\beta$  polymorphs and BM-1 in the high-frequency region.

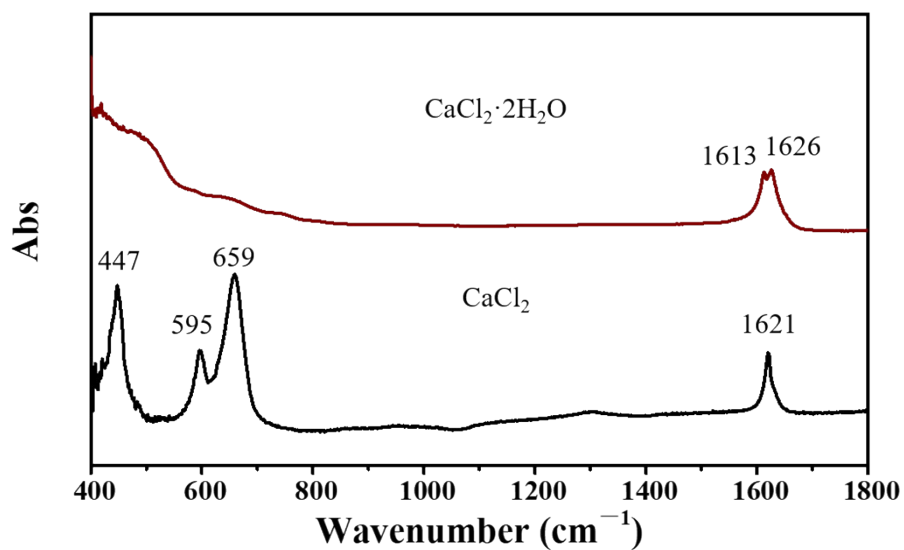

**Figure S9.** IR spectra of CaCl<sub>2</sub> and CaCl<sub>2</sub>·2H<sub>2</sub>O in the range of 400-1800 cm<sup>-1</sup>.

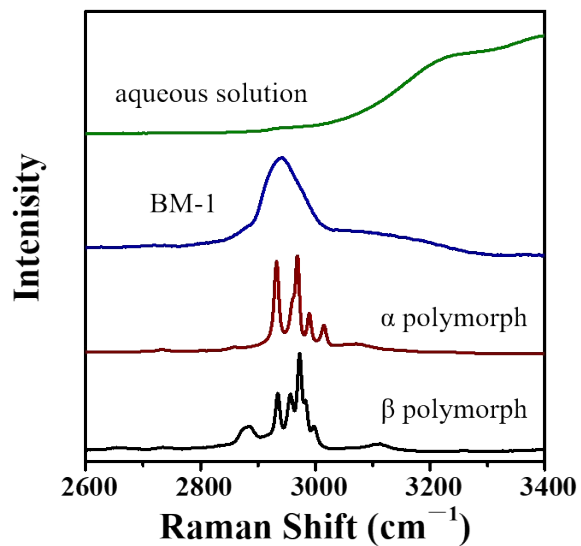

**Figure S10.** High-frequency Raman spectra of  $\alpha$  polymorph,  $\beta$  polymorph, BM-1, and Glu aqueous solution.

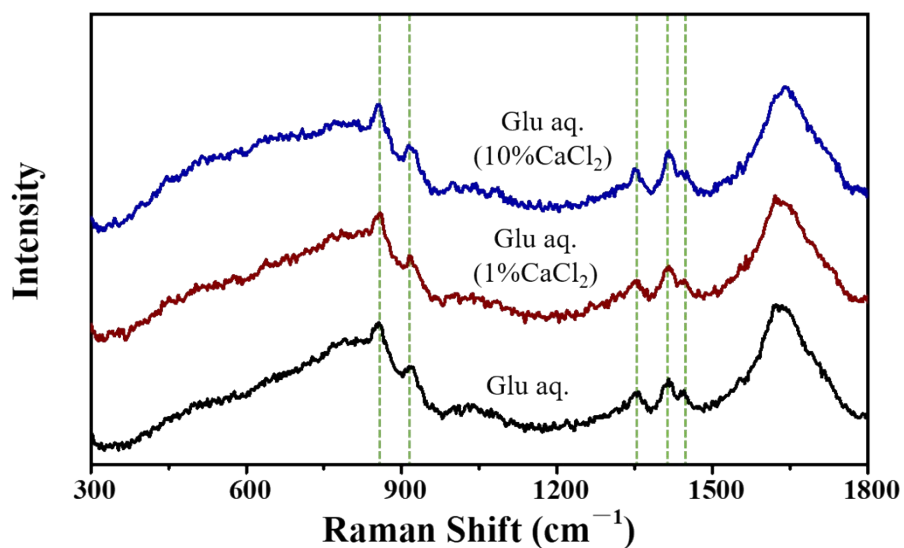

**Figure S11.** Mid-frequency Raman spectra of saturated Glu aqueous solution, 1% CaCl<sub>2</sub> aqueous solution, and 10% CaCl<sub>2</sub> aqueous solution.

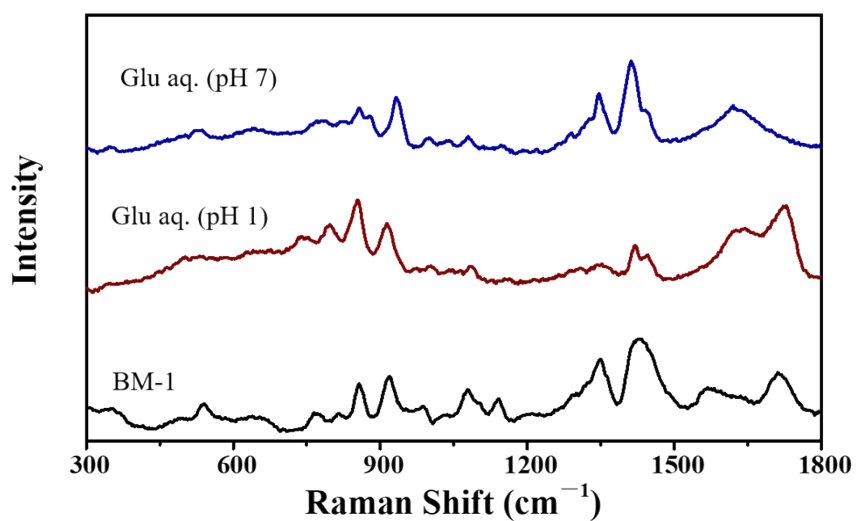

**Figure S12.** Mid-frequency Raman spectra of BM-1, 10% Glu in the pH 1 solution and pH 7 solution.

**Table S1.** Typical mid-frequency Raman bands in the range of 300-1800  $\text{cm}^{-1}$  of Glu samples.

11 bands of BM-1 were chosen for comparison. AQ and BM-1 are as reference.

| <b>AQ</b> | <b>BM-1</b> | <b>pH 1</b> | <b>pH 7</b> |
|-----------|-------------|-------------|-------------|
|           | 540         |             |             |
|           | 765         |             |             |
| 812       | 816         | 796         |             |
| 856       | 857         | 853         | 857         |
| 915       | 919         | 915         | 938         |
|           | 987         |             |             |
|           | 1079        |             |             |
|           | 1141        |             |             |
| 1352      | 1350        |             |             |
| 1414      | 1432        | 1419        | 1412        |
|           |             | 1620        | 1620        |
|           | 1712        | 1724        |             |
